# Supplementary material for: Preparation of S/N-codoped carbon nanosheets with tunable interlayer distance for high-rate sodium-ion batteries
Source: Royal Society of Chemistry journal article supplement (doi:10.1039/c7gc01942d), 2017-01-01
Supplement: c7gc01942d1.pdf [file c7gc01942d1.pdf]

## Supporting Information

### **Preparation of S/N-codoped Carbon Nanosheets with tunable interlayer distance for High-Rate Sodium-ion Batteries**

*Guoqiang Zou, Hongshuai Hou, Ganggang Zhao, Zhaodong Huang, Peng Ge, and Xiaobo*

*Ji\**

College of Chemistry and Chemical Engineering, Central South University, Changsha,  
410083, China

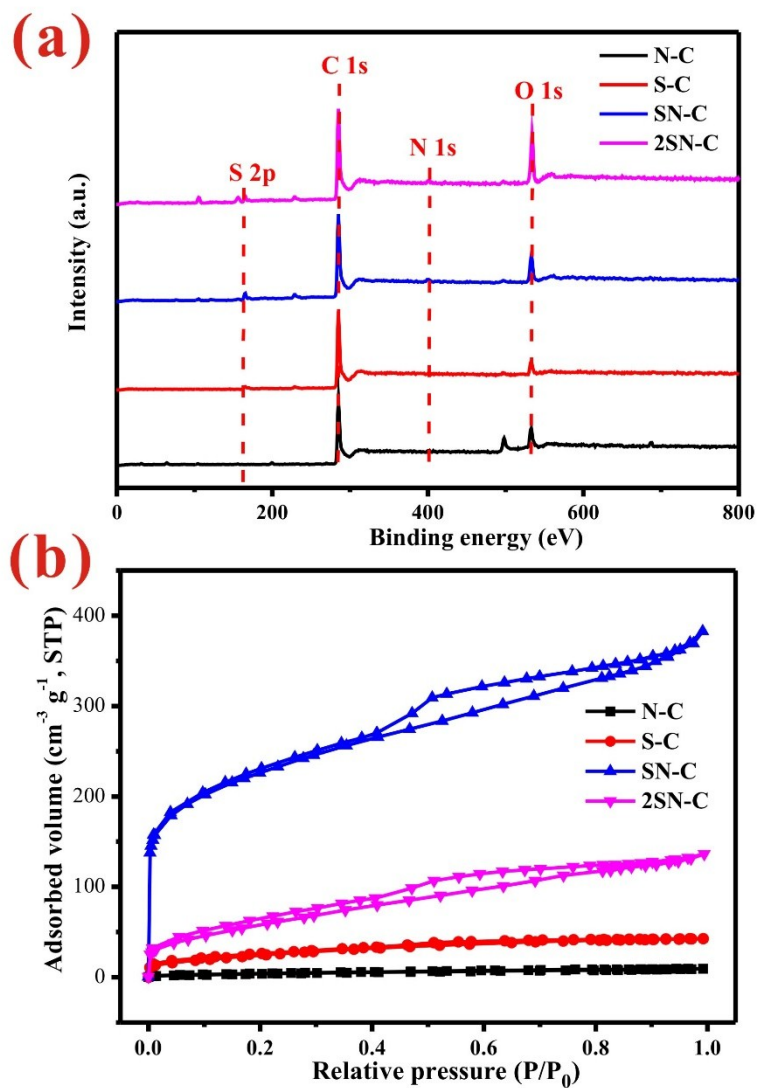

**Figure S1** The XPS surveys and N<sub>2</sub> absorption-desorption isotherms of the N-C, S-C, SN-C, and 2SN-C, respectively

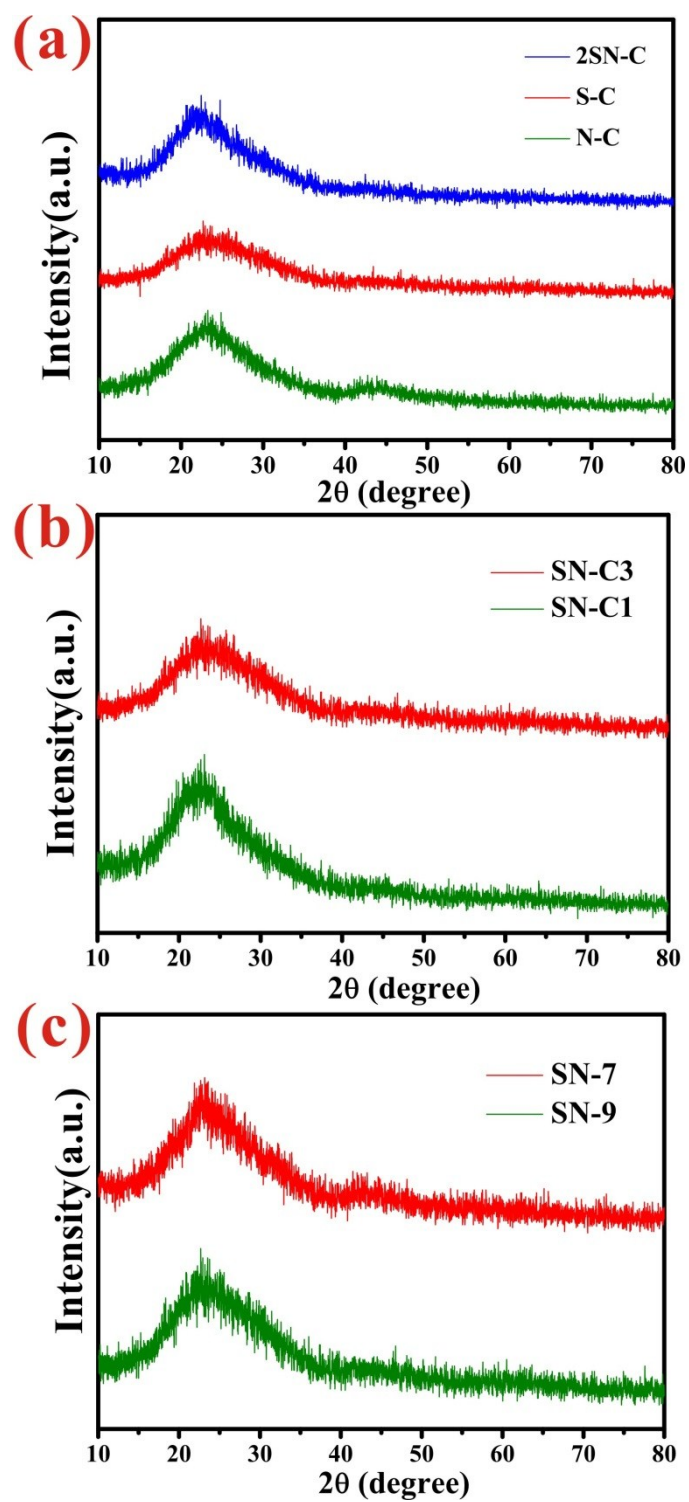

**Figure S2** The XRD patterns of obtained carbon materials.

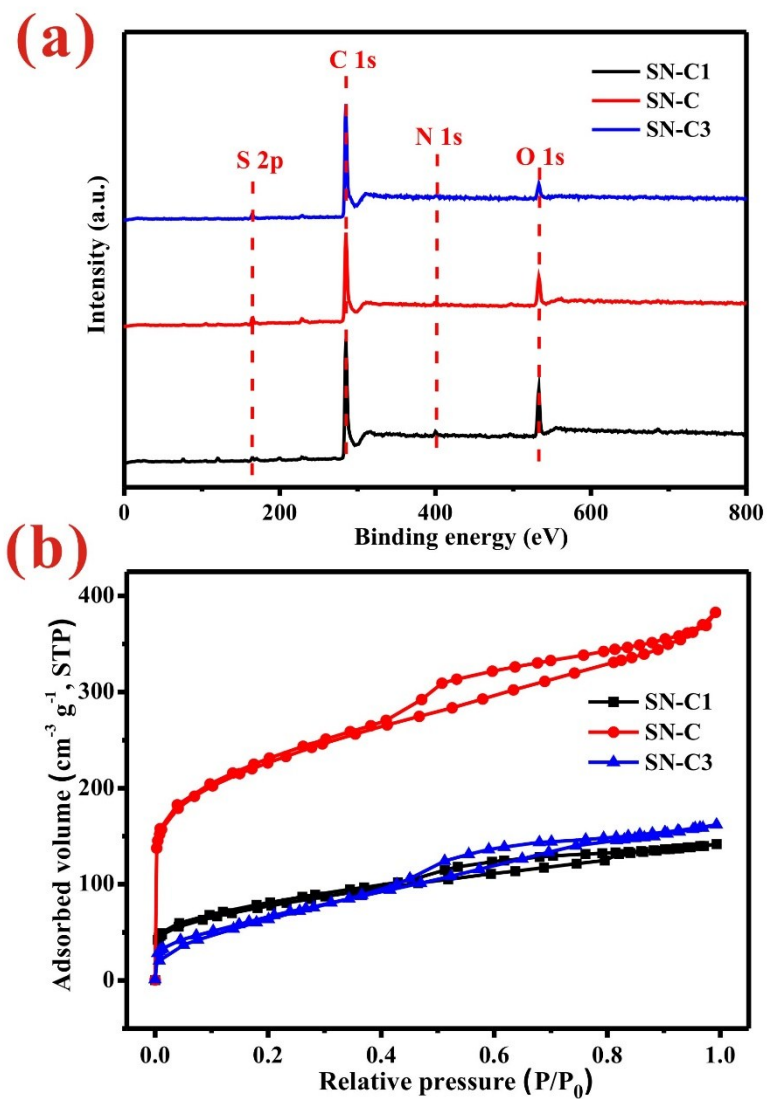

**Figure S3** The XPS surveys and N<sub>2</sub> absorption-desorption isotherms of the SN-C1, SN-C, and SN-C3, respectively

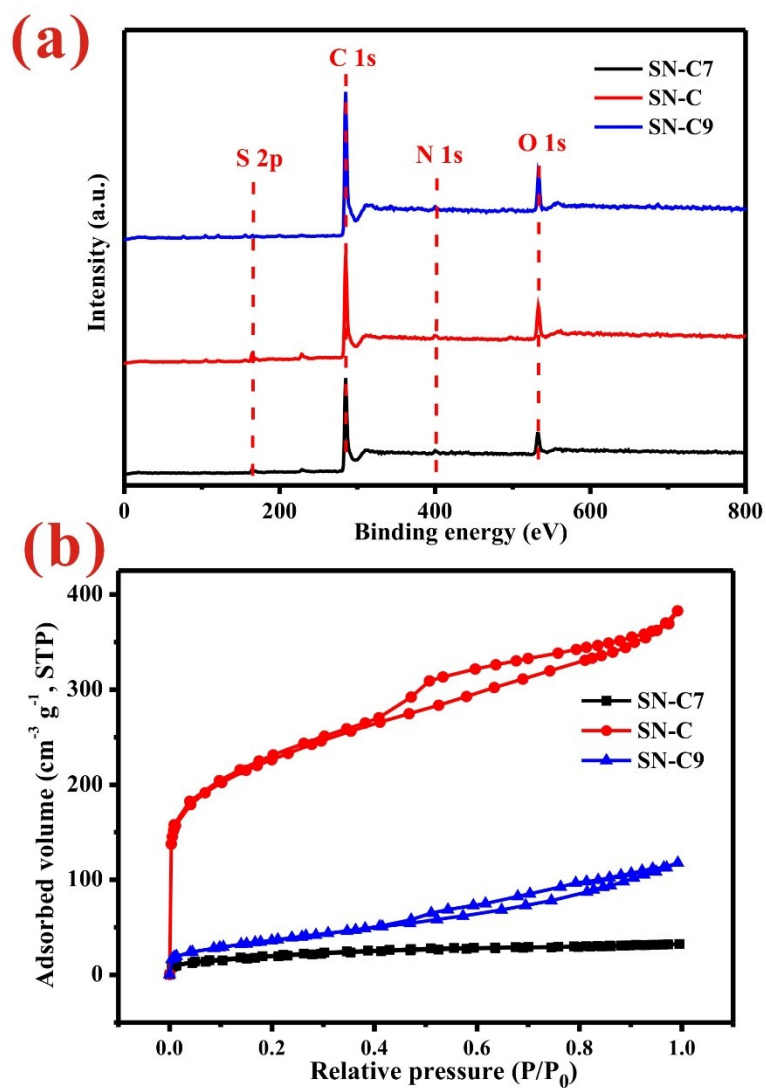

**Figure S4** The XPS surveys and N<sub>2</sub> absorption-desorption isotherms of the SN-C7, SN-C, and SN-C9, respectively

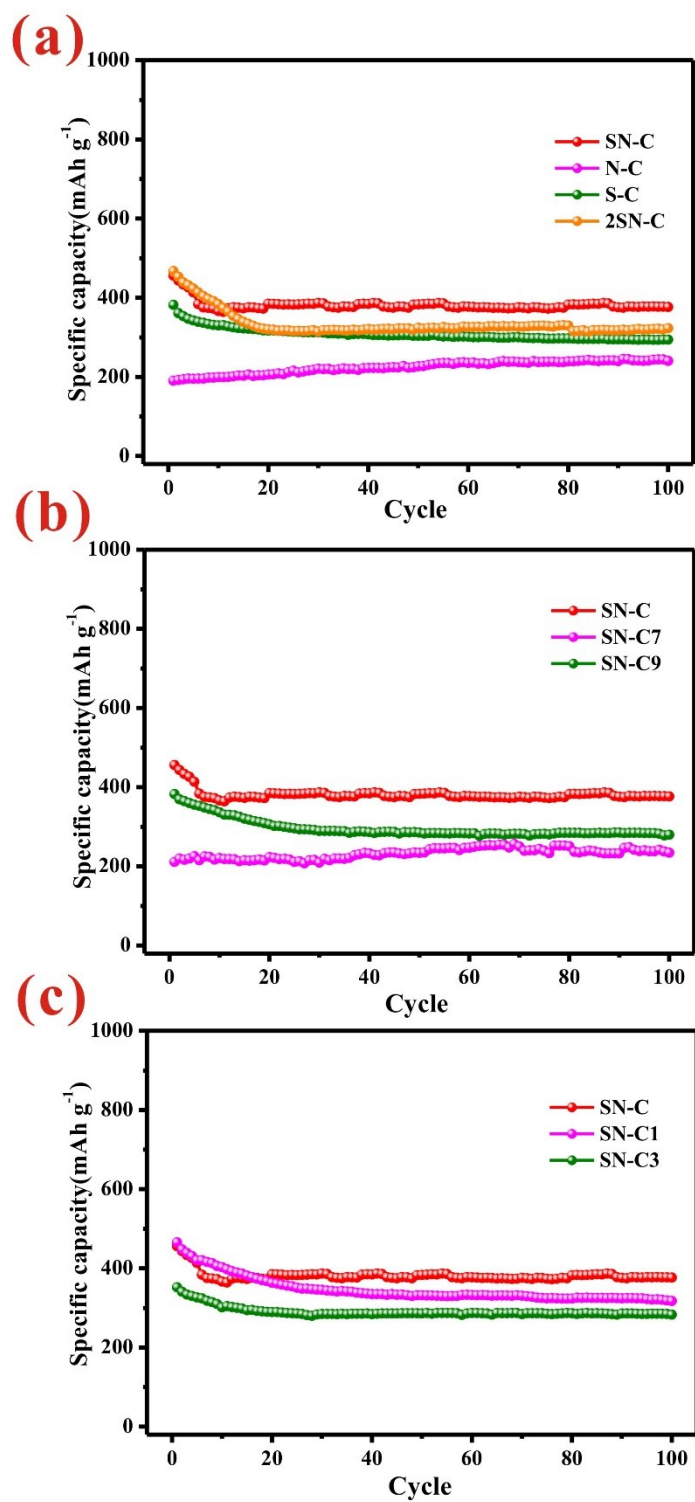

**Figure S5** (a, b, and c) The galvanostatic charge tests of the obtained samples at 0.1 A g<sup>-1</sup> within the voltage range from 0.01 to 3 V (vs. Na<sup>+</sup>/Na)

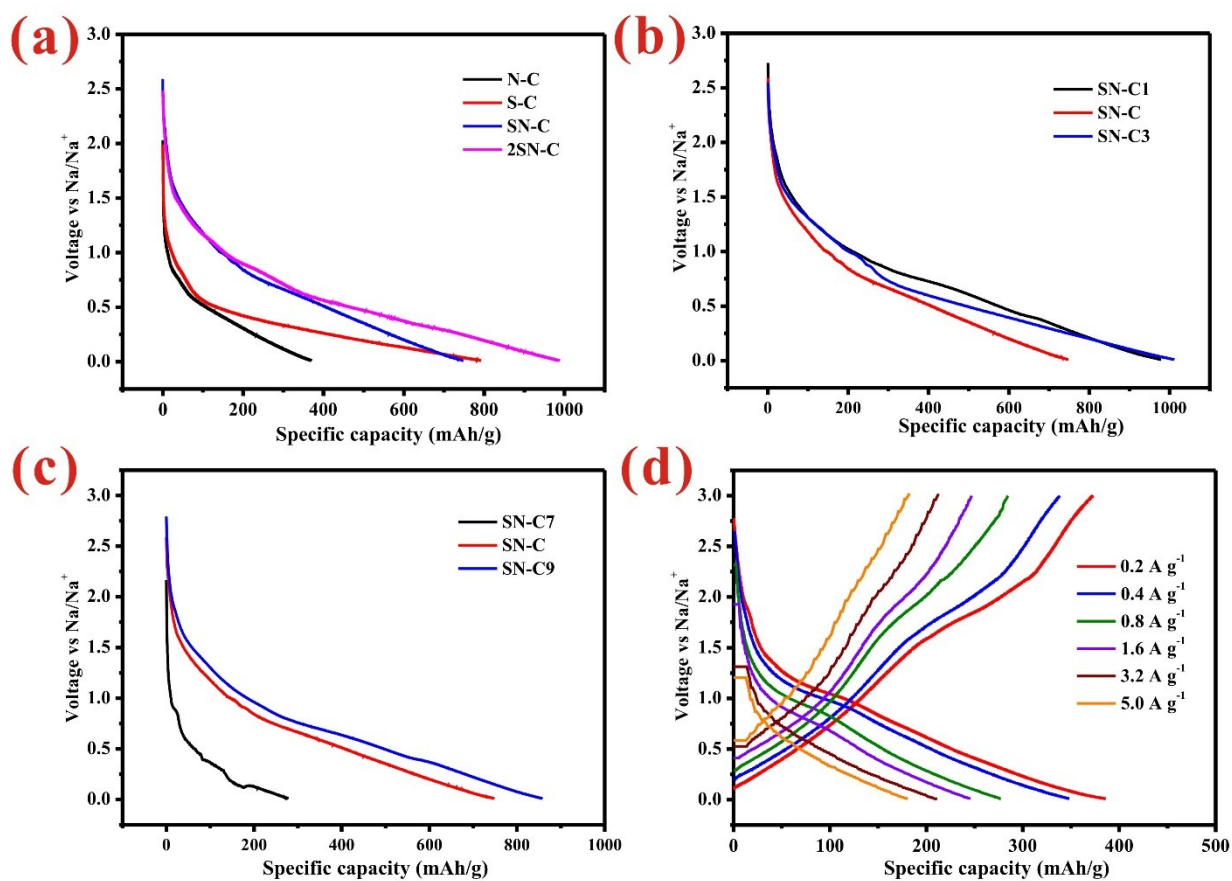

**Figure S6** (a, b, and c) The related discharge curves of the obtained carbon materials at 0.1 A g<sup>-1</sup>, and (d) is the discharge/charge curves of SN-C anode SIBs under different current densities
